# Supplementary material for: Effect of free amino acids and peptide hydrolysates from sunflower seed protein on the formation of pyrazines under different heating conditions
Source: Royal Society of Chemistry journal article supplement (doi:10.1039/d1ra05140g), 2021-01-01
Supplement: d1ra05140g1.pdf [file d1ra05140g1.pdf]

**Supplementary materials Table S1.** Volatiles (GC-MS Peak Area  $\times 10^6$ ) detected in the native *SSP* model under different heating conditions

| No. | RT (min) | Substances                             | 100 °C, 30 min           | 100 °C, 60 min           | 100 °C, 90 min          | 100 °C, 120 min          | 100 °C, 150 min          |
|-----|----------|----------------------------------------|--------------------------|--------------------------|-------------------------|--------------------------|--------------------------|
| 1   | 3.704    | 2-methylfural                          | 1.88±0.10 <sup>Ed</sup>  | 9.75±0.22 <sup>Ca</sup>  | 7.33±0.13 <sup>Da</sup> | 13.10±0.10 <sup>Ba</sup> | 15.47±0.07 <sup>Aa</sup> |
| 2   | 7.139    | Hexanal                                | 6.30±0.20 <sup>Aa</sup>  | 5.00±0.04 <sup>Bb</sup>  | 4.03±0.07 <sup>Cb</sup> | 4.90±0.04 <sup>Cc</sup>  | 3.20±0.10 <sup>Dd</sup>  |
| 3   | 8.873    | 2-Heptanone                            | 2.78±0.02 <sup>Ac</sup>  | 2.70±0.04 <sup>Ad</sup>  | 2.24±0.06 <sup>Dd</sup> | 2.58±0.05 <sup>Be</sup>  | 2.34±0.06 <sup>Cc</sup>  |
| 4   | 8.906    | Heptanal                               | ND                       | ND                       | ND                      | ND                       | ND                       |
| 5   | 9.573    | Pyrazine                               | 0.06±0.001 <sup>Cf</sup> | 0.10±0.01 <sup>Ba</sup>  | 0.11±0.01 <sup>Bh</sup> | 0.18±0.01 <sup>Aj</sup>  | 0.18±0.02 <sup>Aa</sup>  |
| 6   | 9.857    | 2-pentylfural                          | 3.58±0.08 <sup>De</sup>  | 4.65±0.13 <sup>Cc</sup>  | 3.57±0.05 <sup>Dc</sup> | 5.31±0.04 <sup>Bb</sup>  | 7.95±0.02 <sup>Ai</sup>  |
| 7   | 10.915   | 2-methylpyrazine                       | 0.18±0.03 <sup>Cc</sup>  | 0.57±0.04 <sup>BCf</sup> | 0.78±0.03 <sup>Bf</sup> | 1.26±0.04 <sup>Af</sup>  | 1.41±0.03 <sup>Af</sup>  |
| 8   | 12.874   | 2,5(6)-dimethylpyrazine                | ND                       | 0.10±0.02 <sup>Dh</sup>  | 0.22±0.02 <sup>Cg</sup> | 0.42±0.01 <sup>Ah</sup>  | 0.37±0.02 <sup>Bh</sup>  |
| 9   | 13.074   | 2-ethylpyrazine                        | ND                       | ND                       | ND                      | ND                       | 0.22±0.02 <sup>j</sup>   |
| 10  | 13.508   | 2,3-dimethylpyrazine                   | ND                       | ND                       | ND                      | ND                       | ND                       |
| 11  | 14.933   | Nonanal                                | 0.33±0.03 <sup>Be</sup>  | 0.40±0.01 <sup>Ag</sup>  | 0.26±0.01 <sup>Cg</sup> | 0.26±0.02 <sup>Ci</sup>  | 0.29±0.02 <sup>Ci</sup>  |
| 12  | 15.108   | 2-ethyl-5-methylpyrazine               | ND                       | ND                       | ND                      | ND                       | ND                       |
| 13  | 15.508   | 2, 3, 5-trimethylpyrazine              | ND                       | ND                       | ND                      | ND                       | ND                       |
| 14  | 15.517   | 2-ethyl-3-methylpyrazine               | ND                       | ND                       | ND                      | ND                       | ND                       |
| 15  | 16.834   | 3-ethyl-2,5-dimethylpyrazine           | ND                       | ND                       | ND                      | ND                       | ND                       |
| 16  | 17.284   | Furfural                               | 0.13±0.01 <sup>Ef</sup>  | 0.35±0.03 <sup>Cg</sup>  | 0.24±0.01 <sup>Dg</sup> | 0.66±0.02 <sup>Bg</sup>  | 1.04±0.03 <sup>Ag</sup>  |
| 17  | 17.860   | 2-methyl-5-propylpyrazine              | ND                       | ND                       | ND                      | ND                       | ND                       |
| 18  | 18.343   | 3,5-diethyl-2-methylpyrazine           | ND                       | ND                       | ND                      | ND                       | ND                       |
| 19  | 22.936   | 2-Furanylmethanol                      | 0.35±0.04 <sup>Ee</sup>  | 1.72±0.06 <sup>Ce</sup>  | 1.49±0.04 <sup>De</sup> | 3.37±0.04 <sup>Bd</sup>  | 4.33±0.03 <sup>Ac</sup>  |
|     |          | Total pyrazines                        | 0.24                     | 0.77                     | 1.11                    | 1.86                     | 2.18                     |
|     |          | Pyrazines (% of total GC-MS peak area) | 2.00                     | 3.00                     | 5.00                    | 6.00                     | 6.00                     |

| No. | RT (min) | Substances                            | 110 °C, 30 min          | 110 °C, 60 min          | 110 °C, 90 min          | 110 °C, 120 min          | 110 °C, 150 min         |
|-----|----------|---------------------------------------|-------------------------|-------------------------|-------------------------|--------------------------|-------------------------|
| 1   | 3.704    | 2-methylfural                         | 2.55±0.03 <sup>Ea</sup> | 4.53±0.08 <sup>Da</sup> | 5.59±0.03 <sup>Aa</sup> | 5.07±0.04 <sup>Ca</sup>  | 5.19±0.04 <sup>Ba</sup> |
| 2   | 7.139    | Hexanal                               | 2.52±0.02 <sup>Ab</sup> | 2.36±0.02 <sup>Bc</sup> | 1.84±0.03 <sup>Cd</sup> | 1.34±0.02 <sup>Dd</sup>  | 1.26±0.03 <sup>Ed</sup> |
| 3   | 8.873    | 2-Heptanone                           | 1.47±0.05 <sup>Ad</sup> | 1.05±0.04 <sup>Ae</sup> | 1.03±0.02 <sup>Ae</sup> | 1.02±0.03 <sup>Ae</sup>  | 1.02±0.01 <sup>Ae</sup> |
| 4   | 8.906    | Heptanal                              | ND                      | ND                      | ND                      | ND                       | ND                      |
| 5   | 9.573    | Pyrazine                              | 0.02±0.01 <sup>Bh</sup> | 0.05±0.01 <sup>Bi</sup> | 0.07±0.01 <sup>Ai</sup> | 0.07±0.02 <sup>Ai</sup>  | 0.07±0.03 <sup>Aa</sup> |
| 6   | 9.857    | 2-pentylfural                         | 2.37±0.02 <sup>Dc</sup> | 3.54±0.03 <sup>Ch</sup> | 4.01±0.03 <sup>Ah</sup> | 3.71±0.05 <sup>Bh</sup>  | 3.71±0.03 <sup>Bi</sup> |
| 7   | 10.915   | 2-methylpyrazine                      | 0.09±0.02 <sup>Db</sup> | 0.25±0.02 <sup>Cg</sup> | 0.37±0.01 <sup>Bg</sup> | 0.49±0.03 <sup>Agf</sup> | 0.45±0.04 <sup>Ag</sup> |
| 8   | 12.874   | 2,5(6)-dimethylpyrazine               | ND                      | 0.16±0.01 <sup>Bh</sup> | 0.19±0.02 <sup>Bh</sup> | 0.25±0.03 <sup>Ah</sup>  | 0.23±0.01 <sup>Ah</sup> |
| 9   | 13.074   | 2-ethylpyrazine                       | ND                      | ND                      | ND                      | ND                       | 0.06±0.01 <sup>j</sup>  |
| 10  | 13.508   | 2,3-dimethylpyrazine                  | ND                      | ND                      | ND                      | ND                       | ND                      |
| 11  | 14.933   | Nonanal                               | 0.55±0.03 <sup>Bc</sup> | 0.46±0.02 <sup>Cf</sup> | 0.42±0.01 <sup>Cf</sup> | 0.52±0.04 <sup>Bf</sup>  | 0.61±0.01 <sup>Af</sup> |
| 12  | 15.108   | 2-ethyl-5-methylpyrazine              | ND                      | ND                      | ND                      | ND                       | ND                      |
| 13  | 15.508   | 2, 3, 5-trimethylpyrazine             | ND                      | ND                      | ND                      | ND                       | ND                      |
| 14  | 15.517   | 2-ethyl-3-methylpyrazine              | ND                      | ND                      | ND                      | ND                       | ND                      |
| 15  | 16.834   | 3-ethyl-2,5-dimethylpyrazine          | ND                      | ND                      | ND                      | ND                       | ND                      |
| 16  | 17.284   | Furfural                              | 0.07±0.01 <sup>Dg</sup> | 0.07±0.02 <sup>Di</sup> | 0.41±0.03 <sup>Cf</sup> | 0.46±0.01 <sup>Bg</sup>  | 0.56±0.04 <sup>Ag</sup> |
| 17  | 17.860   | 2-methyl-5-propylpyrazine             | ND                      | ND                      | ND                      | ND                       | ND                      |
| 18  | 18.343   | 3,5-diethyl-2-methylpyrazine          | ND                      | ND                      | ND                      | ND                       | ND                      |
| 19  | 22.936   | 2-Furanylmethanol                     | 0.40±0.01 <sup>Ef</sup> | 1.25±0.02 <sup>Dd</sup> | 1.88±0.03 <sup>Cc</sup> | 2.18±0.04 <sup>Bc</sup>  | 2.69±0.02 <sup>Ac</sup> |
|     |          | Total pyrazines                       | 0.11                    | 0.46                    | 0.63                    | 0.81                     | 0.81                    |
|     |          | Pyrazines (%of total GC-MS peak area) | 1.00                    | 3.00                    | 4.00                    | 5.00                     | 5.00                    |

| No. | RT (min) | Substances                             | 120 °C, 30 min          | 120 °C, 60 min           | 120 °C, 90 min           | 120 °C, 120 min         | 120 °C, 150 min          |
|-----|----------|----------------------------------------|-------------------------|--------------------------|--------------------------|-------------------------|--------------------------|
| 1   | 3.704    | 2-methylfural                          | 8.28±0.05 <sup>Db</sup> | 10.58±0.04 <sup>Cb</sup> | 11.38±0.12 <sup>Bb</sup> | 8.25±0.04 <sup>Da</sup> | 12.65±0.05 <sup>Ab</sup> |
| 2   | 7.139    | Hexanal                                | 3.47±0.02 <sup>Ad</sup> | 2.80±0.03 <sup>Bd</sup>  | 2.41±0.03 <sup>Ce</sup>  | 2.35±0.05 <sup>Dd</sup> | 2.25±0.02 <sup>Ee</sup>  |
| 3   | 8.873    | 2-Heptanone                            | 1.72±0.03 <sup>Ae</sup> | 1.45±0.04 <sup>CDg</sup> | 1.50±0.02 <sup>Cg</sup>  | 1.64±0.03 <sup>Be</sup> | 1.40±0.02 <sup>Df</sup>  |
| 4   | 8.906    | Heptanal                               | ND                      | ND                       | ND                       | 8.13±0.02 <sup>a</sup>  | ND                       |
| 5   | 9.573    | Pyrazine                               | ND                      | ND                       | ND                       | ND                      | ND                       |
| 6   | 9.857    | 2-pentylfural                          | 8.75±0.04 <sup>Da</sup> | 11.97±0.02 <sup>Ca</sup> | 12.35±0.04 <sup>Ba</sup> | 8.13±0.13 <sup>Eb</sup> | 13.18±0.15 <sup>Aa</sup> |
| 7   | 10.915   | 2-methylpyrazine                       | 0.60±0.01 <sup>Dh</sup> | 0.94±0.02 <sup>Ch</sup>  | 1.01±0.04 <sup>Bh</sup>  | 1.42±0.06 <sup>Af</sup> | 0.90±0.02 <sup>Cg</sup>  |
| 8   | 12.874   | 2,5(6)-dimethylpyrazine                | 0.17±0.02 <sup>Ei</sup> | 0.28±0.01 <sup>Di</sup>  | 0.43±0.02 <sup>Ci</sup>  | 0.69±0.02 <sup>Bg</sup> | 0.85±0.03 <sup>Ag</sup>  |
| 9   | 13.074   | 2-ethylpyrazine                        | ND                      | ND                       | ND                       | ND                      | ND                       |
| 10  | 13.508   | 2,3-dimethylpyrazine                   | ND                      | ND                       | ND                       | ND                      | ND                       |
| 11  | 14.933   | Nonanal                                | 1.40±0.03 <sup>Cf</sup> | 2.49±0.14 <sup>Be</sup>  | 2.52±0.12 <sup>Bd</sup>  | 2.53±0.08 <sup>Bc</sup> | 5.27±0.08 <sup>Ad</sup>  |
| 12  | 15.108   | 2-ethyl-5-methylpyrazine               | ND                      | 0.10±0.02 <sup>Cj</sup>  | 0.17±0.03 <sup>Bj</sup>  | 0.19±0.01 <sup>Bi</sup> | 0.38±0.05 <sup>Ah</sup>  |
| 13  | 15.508   | 2, 3, 5-trimethylpyrazine              | ND                      | ND                       | ND                       | ND                      | ND                       |
| 14  | 15.517   | 2-ethyl-3-methylpyrazine               | ND                      | ND                       | ND                       | ND                      | ND                       |
| 15  | 16.834   | 3-ethyl-2,5-dimethylpyrazine           | ND                      | ND                       | ND                       | ND                      | ND                       |
| 16  | 17.284   | Furfural                               | 1.08±0.03 <sup>Dg</sup> | 1.65±0.04 <sup>Af</sup>  | 1.73±0.03 <sup>Af</sup>  | 1.49±0.07 <sup>Bf</sup> | 1.39±0.06 <sup>Cf</sup>  |
| 17  | 17.860   | 2-methyl-5-propylpyrazine              | ND                      | ND                       | ND                       | ND                      | ND                       |
| 18  | 18.343   | 3,5-diethyl-2-methylpyrazine           | ND                      | ND                       | ND                       | ND                      | ND                       |
| 19  | 22.936   | 2-Furanylmethanol                      | 3.95±0.04 <sup>Dc</sup> | 8.02±0.06 <sup>Cc</sup>  | 9.03±0.19 <sup>Bc</sup>  | 0.48±0.03 <sup>Eh</sup> | 9.70±0.50 <sup>Ac</sup>  |
|     |          | Total pyrazines                        | 0.77                    | 1.32                     | 1.61                     | 2.30                    | 2.13                     |
|     |          | Pyrazines (% of total GC-MS peak area) | 2.60                    | 3.30                     | 3.80                     | 6.50                    | 4.40                     |

| No. | RT (min) | Substances                             | 130 °C, 30 min           | 130 °C, 60 min            | 130 °C, 90 min           | 130 °C, 120 min          | 130 °C, 150 min          |
|-----|----------|----------------------------------------|--------------------------|---------------------------|--------------------------|--------------------------|--------------------------|
| 1   | 3.704    | 2-methylfural                          | 3.02±0.18 <sup>Ea</sup>  | 4.08±0.06 <sup>Da</sup>   | 4.53±0.02 <sup>Ca</sup>  | 6.08±0.10 <sup>Ba</sup>  | 5.58±0.12 <sup>Aa</sup>  |
| 2   | 7.139    | Hexanal                                | 1.21±0.12 <sup>Ac</sup>  | 0.91±0.03 <sup>Bd</sup>   | 0.92±0.03 <sup>Be</sup>  | 0.97±0.02 <sup>Be</sup>  | 1.11±0.02 <sup>Ac</sup>  |
| 3   | 8.873    | 2-Heptanone                            | 0.51±0.05 <sup>Bde</sup> | 0.41±0.05 <sup>Ce</sup>   | 0.50±0.02 <sup>Bf</sup>  | 0.42±0.01 <sup>Cf</sup>  | 0.71±0.02 <sup>Af</sup>  |
| 4   | 8.906    | Heptanal                               | ND                       | ND                        | ND                       | ND                       | ND                       |
| 5   | 9.573    | Pyrazine                               | 0.04±0.01 <sup>De</sup>  | 0.07±0.01 <sup>Cgh</sup>  | 0.08±0.01 <sup>Ch</sup>  | 0.98±0.02 <sup>Ad</sup>  | 0.11±0.01 <sup>Bab</sup> |
| 6   | 9.857    | 2-pentylfural                          | 2.50±1.19 <sup>Db</sup>  | 4.01±0.03 <sup>Ca</sup>   | 4.04±0.05 <sup>Cb</sup>  | 5.00±0.40 <sup>Bb</sup>  | 5.50±0.40 <sup>Ah</sup>  |
| 7   | 10.915   | 2-methylpyrazine                       | 0.19±0.02 <sup>Bde</sup> | 0.21±0.02 <sup>Bf</sup>   | 0.28±0.03 <sup>Ag</sup>  | 0.30±0.02 <sup>Afg</sup> | 0.30±0.01 <sup>Agh</sup> |
| 8   | 12.874   | 2,5(6)-dimethylpyrazine                | 0.07±0.01 <sup>De</sup>  | 0.16±0.04 <sup>Cfg</sup>  | 0.32±0.01 <sup>Bg</sup>  | 0.39±0.03 <sup>Af</sup>  | 0.43±0.01 <sup>Ag</sup>  |
| 9   | 13.074   | 2-ethylpyrazine                        | 0.02±0.01 <sup>Be</sup>  | 0.04±0.01 <sup>ABgh</sup> | 0.06±0.01 <sup>Ahi</sup> | 0.05±0.02 <sup>Agh</sup> | 0.05±0.01 <sup>Ai</sup>  |
| 10  | 13.508   | 2,3-dimethylpyrazine                   | ND                       | ND                        | ND                       | ND                       | ND                       |
| 11  | 14.933   | Nonanal                                | 0.68±0.06 <sup>Cd</sup>  | 1.56±0.16 <sup>Bc</sup>   | 1.58±0.15 <sup>Bd</sup>  | 3.07±0.02 <sup>Ad</sup>  | 3.06±0.03 <sup>Ad</sup>  |
| 12  | 15.108   | 2-ethyl-5-methylpyrazine               | ND                       | ND                        | 0.13±0.02 <sup>Ah</sup>  | 0.12±0.03 <sup>Agh</sup> | 0.12±0.01 <sup>Ahi</sup> |
| 13  | 15.508   | 2, 3, 5-trimethylpyrazine              | ND                       | ND                        | ND                       | ND                       | ND                       |
| 14  | 15.517   | 2-ethyl-3-methylpyrazine               | ND                       | ND                        | ND                       | ND                       | ND                       |
| 15  | 16.834   | 3-ethyl-2,5-dimethylpyrazine           | ND                       | ND                        | ND                       | ND                       | ND                       |
| 16  | 17.284   | Furfural                               | 0.54±0.02 <sup>Ade</sup> | 0.51±0.08 <sup>Ae</sup>   | 0.52±0.06 <sup>Af</sup>  | 0.46±0.04 <sup>Af</sup>  | 0.52±0.02 <sup>Afg</sup> |
| 17  | 17.860   | 2-methyl-5-propylpyrazine              | ND                       | ND                        | ND                       | ND                       | ND                       |
| 18  | 18.343   | 3,5-diethyl-2-methylpyrazine           | ND                       | ND                        | ND                       | ND                       | ND                       |
| 19  | 22.936   | 2-Furanylmethanol                      | 2.08±0.08 <sup>Bb</sup>  | 2.07±0.22 <sup>Bb</sup>   | 2.06±0.03 <sup>Bc</sup>  | 3.71±0.51 <sup>Ac</sup>  | 3.60±0.40 <sup>Ac</sup>  |
|     |          | Total pyrazines                        | 0.32                     | 0.48                      | 0.87                     | 1.84                     | 1.01                     |
|     |          | Pyrazines (% of total GC-MS peak area) | 2.90                     | 3.40                      | 5.80                     | 8.50                     | 4.80                     |

| No. | RT (min) | Substances                             | 140 °C, 30 min            | 140 °C, 60 min           | 140 °C, 90 min            | 140 °C, 120 min          | 140 °C, 150 min           |
|-----|----------|----------------------------------------|---------------------------|--------------------------|---------------------------|--------------------------|---------------------------|
| 1   | 3.704    | 2-methylfural                          | 8.69±0.69 <sup>Ca</sup>   | 10.85±0.2 <sup>Ba</sup>  | 2.01±0.11 <sup>Db</sup>   | 2.97±0.06 <sup>Da</sup>  | 13.01±1.00 <sup>Aa</sup>  |
| 2   | 7.139    | Hexanal                                | 3.21±0.21 <sup>Ae</sup>   | 2.88±0.08 <sup>Be</sup>  | ND                        | ND                       | 1.43±0.06 <sup>Cg</sup>   |
| 3   | 8.873    | 2-Heptanone                            | ND                        | ND                       | 0.43±0.02 <sup>ABd</sup>  | 0.08±0.02 <sup>Bfg</sup> | 1.01±0.55 <sup>Ahij</sup> |
| 4   | 8.906    | Heptanal                               | ND                        | ND                       | ND                        | ND                       | ND                        |
| 5   | 9.573    | Pyrazine                               | 0.37±0.05 <sup>Aabc</sup> | 0.41±0.02 <sup>Ab</sup>  | 0.07±0.01 <sup>Cef</sup>  | 0.09±0.02 <sup>Cfg</sup> | 0.12±0.01 <sup>Bjk</sup>  |
| 6   | 9.857    | 2-pentylfural                          | 7.65±0.68 <sup>Bb</sup>   | 6.54±0.30 <sup>Cc</sup>  | 2.64±0.64 <sup>Df</sup>   | 2.08±0.07 <sup>Dc</sup>  | 10.11±0.11 <sup>Ab</sup>  |
| 7   | 10.915   | 2-methylpyrazine                       | 0.60±0.02 <sup>Ag</sup>   | 0.68±0.04 <sup>Ag</sup>  | 0.07±0.02 <sup>Bef</sup>  | 0.08±0.01 <sup>Bfg</sup> | 0.45±0.08 <sup>Ahij</sup> |
| 8   | 12.874   | 2,5(6)-dimethylpyrazine                | 0.47±0.05 <sup>Cgh</sup>  | 1.10±0.10 <sup>Ad</sup>  | 0.31±0.03 <sup>Cce</sup>  | 0.29±0.03 <sup>Ce</sup>  | 0.64±0.04 <sup>Bf</sup>   |
| 9   | 13.074   | 2-ethylpyrazine                        | 0.18±0.06 <sup>Aghi</sup> | 0.21±0.02 <sup>Ai</sup>  | 0.03±0.001 <sup>Bf</sup>  | 0.01±0.001 <sup>Bg</sup> | 0.20±0.02 <sup>Ajk</sup>  |
| 10  | 13.508   | 2,3-dimethylpyrazine                   | ND                        | ND                       | ND                        | ND                       | ND                        |
| 11  | 14.933   | Nonanal                                | 4.27±0.27 <sup>Cd</sup>   | 7.02±0.04 <sup>Ah</sup>  | 1.77±0.12 <sup>Ebc</sup>  | 2.16±0.16 <sup>Db</sup>  | 6.25±0.05 <sup>Bd</sup>   |
| 12  | 15.108   | 2-ethyl-5-methylpyrazine               | 0.12±0.01 <sup>Dhi</sup>  | 0.54±0.02 <sup>Bgh</sup> | 0.07±0.002 <sup>Eef</sup> | 0.15±0.02 <sup>Cf</sup>  | 0.62±0.01 <sup>Agh</sup>  |
| 13  | 15.508   | 2, 3, 5-trimethylpyrazine              | ND                        | ND                       | ND                        | ND                       | 0.61±0.05 <sup>hi</sup>   |
| 14  | 15.517   | 2-ethyl-3-methylpyrazine               | ND                        | ND                       | 0.03±0.002 <sup>f</sup>   | ND                       | ND                        |
| 15  | 16.834   | 3-ethyl-2,5-dimethylpyrazine           | ND                        | 0.98±0.02 <sup>Af</sup>  | ND                        | 0.15±0.01 <sup>Cf</sup>  | 0.87±0.03 <sup>Be</sup>   |
| 16  | 17.284   | Furfural                               | 1.36±0.10 <sup>Af</sup>   | 1.13±0.12 <sup>Bf</sup>  | 0.38±0.02 <sup>Cd</sup>   | 0.26±0.04 <sup>Ce</sup>  | ND                        |
| 17  | 17.860   | 2-methyl-5-propylpyrazine              | ND                        | ND                       | ND                        | ND                       | 0.13±0.01 <sup>ijk</sup>  |
| 18  | 18.343   | 3,5-diethyl-2-methylpyrazine           | ND                        | ND                       | ND                        | ND                       | 0.12±0.04 <sup>ijk</sup>  |
| 19  | 22.936   | 2-Furanylmethanol                      | 6.00±0.08 <sup>Bc</sup>   | 6.01±0.06 <sup>Bd</sup>  | 1.61±0.04 <sup>Cc</sup>   | 1.54±0.05 <sup>Cd</sup>  | 7.71±0.03 <sup>Ac</sup>   |
|     |          | Total pyrazines                        | 1.74                      | 3.92                     | 0.55                      | 0.77                     | 3.76                      |
|     |          | Pyrazines (% of total GC-MS peak area) | 5.00                      | 10.00                    | 6.00                      | 8.00                     | 9.00                      |

Numbers are represented as the means ± standard deviations.

Mean values with different superscript capital letters in the same row have significant differences ( $p < 0.05$ ).

Mean values with different superscript small letters in the same column have significant differences at the same temperature ( $p < 0.05$ ).
