# Supplementary material for: Effect of free amino acids and peptide hydrolysates from sunflower seed protein on the formation of pyrazines under different heating conditions
Source: Royal Society of Chemistry journal article supplement (doi:10.1039/d1ra05140g), 2021-01-01
Supplement: d1ra05140g2.pdf [file d1ra05140g2.pdf]

**Supplementary materials Table S2.** Volatiles (GC-MS Peak Area  $\times 10^6$ ) detected in the native *SSP* & *FAAs* model under different heating conditions

| No. | RT (min) | Substances                             | 100 °C, 30 min                | 100 °C, 60 min                  | 100 °C, 90 min                  | 100 °C, 120 min                | 100 °C, 150 min                 |
|-----|----------|----------------------------------------|-------------------------------|---------------------------------|---------------------------------|--------------------------------|---------------------------------|
| 1   | 3.704    | 2-methylfural                          | 0.72 $\pm$ 0.02 <sup>Dc</sup> | 2.27 $\pm$ 0.24 <sup>Ca</sup>   | 3.31 $\pm$ 0.02 <sup>Ba</sup>   | 5.19 $\pm$ 0.05 <sup>Aa</sup>  | 5.27 $\pm$ 0.09 <sup>Aa</sup>   |
| 2   | 7.139    | Hexanal                                | 0.97 $\pm$ 0.05 <sup>Bb</sup> | 0.98 $\pm$ 0.04 <sup>Bd</sup>   | 0.84 $\pm$ 0.02 <sup>Cd</sup>   | 0.85 $\pm$ 0.01 <sup>Cd</sup>  | 1.05 $\pm$ 0.03 <sup>Ad</sup>   |
| 3   | 8.873    | 2-Heptanone                            | 0.12 $\pm$ 0.03 <sup>Ce</sup> | 0.14 $\pm$ 0.003 <sup>BCf</sup> | 0.15 $\pm$ 0.002 <sup>Bg</sup>  | 0.16 $\pm$ 0.001 <sup>Bf</sup> | 0.19 $\pm$ 0.004 <sup>Ah</sup>  |
| 4   | 8.906    | Heptanal                               | 0.2 $\pm$ 0.005 <sup>Cd</sup> | 0.27 $\pm$ 0.01 <sup>Be</sup>   | 0.26 $\pm$ 0.003 <sup>BCf</sup> | 0.45 $\pm$ 0.08 <sup>Be</sup>  | 0.31 $\pm$ 0.01 <sup>Af</sup>   |
| 5   | 9.573    | Pyrazine                               | ND                            | ND                              | ND                              | ND                             | ND                              |
| 6   | 9.857    | 2-pentylfural                          | 1.24 $\pm$ 0.18 <sup>Da</sup> | 2.13 $\pm$ 0.03 <sup>Cb</sup>   | 2.4 $\pm$ 0.13 <sup>Cb</sup>    | 3.52 $\pm$ 0.26 <sup>Bb</sup>  | 4.31 $\pm$ 0.01 <sup>Ag</sup>   |
| 7   | 10.915   | 2-methylpyrazine                       | ND                            | ND                              | 0.13 $\pm$ 0.01 <sup>Cg</sup>   | 0.21 $\pm$ 0.05 <sup>Bf</sup>  | 0.36 $\pm$ 0.03 <sup>Ac</sup>   |
| 8   | 12.874   | 2,5(6)-dimethylpyrazine                | ND                            | 0.04 $\pm$ 0.002 <sup>Dg</sup>  | 0.05 $\pm$ 0.003 <sup>Ch</sup>  | 0.16 $\pm$ 0.002 <sup>Bf</sup> | 0.18 $\pm$ 0.001 <sup>Ah</sup>  |
| 9   | 13.074   | 2-ethylpyrazine                        | ND                            | ND                              | ND                              | ND                             | ND                              |
| 10  | 13.508   | 2,3-dimethylpyrazine                   | ND                            | ND                              | ND                              | ND                             | ND                              |
| 11  | 14.933   | Nonanal                                | 1.30 $\pm$ 0.01 <sup>Ca</sup> | 1.64 $\pm$ 0.004 <sup>Be</sup>  | 1.64 $\pm$ 0.02 <sup>Bc</sup>   | 2.48 $\pm$ 0.12 <sup>Ac</sup>  | 2.52 $\pm$ 0.02 <sup>Af</sup>   |
| 12  | 15.108   | 2-ethyl-5-methylpyrazine               | ND                            | ND                              | ND                              | ND                             | ND                              |
| 13  | 15.508   | 2, 3, 5-trimethylpyrazine              | ND                            | ND                              | ND                              | ND                             | ND                              |
| 14  | 15.517   | 2-ethyl-3-methylpyrazine               | ND                            | ND                              | ND                              | ND                             | ND                              |
| 15  | 16.834   | 3-ethyl-2,5-dimethylpyrazine           | ND                            | ND                              | ND                              | ND                             | ND                              |
| 16  | 17.284   | Furfural                               | ND                            | ND                              | ND                              | 0.25 $\pm$ 0.01 <sup>Af</sup>  | 0.25 $\pm$ 0.03 <sup>Ag</sup>   |
| 17  | 17.860   | 2-methyl-5-propylpyrazine              | ND                            | ND                              | ND                              | ND                             | ND                              |
| 18  | 18.343   | 3,5-diethyl-2-methylpyrazine           | ND                            | ND                              | ND                              | ND                             | ND                              |
| 19  | 22.936   | 2-Furanylmethanol                      | ND                            | 0.25 $\pm$ 0.01 <sup>Ce</sup>   | 0.51 $\pm$ 0.01 <sup>Be</sup>   | 0.93 $\pm$ 0.07 <sup>Ad</sup>  | 0.29 $\pm$ 0.004 <sup>Cfg</sup> |
|     |          | Total pyrazines                        | 0                             | 0.04                            | 0.18                            | 0.37                           | 0.54                            |
|     |          | Pyrazines (% of total GC-MS peak area) | 0                             | 0.52                            | 1.94                            | 2.61                           | 3.67                            |

| No. | RT (min) | Substances                             | 110 °C, 30 min           | 110 °C, 60 min           | 110 °C, 90 min           | 110 °C, 120 min          | 110 °C, 150 min          |
|-----|----------|----------------------------------------|--------------------------|--------------------------|--------------------------|--------------------------|--------------------------|
| 1   | 3.704    | 2-methylfural                          | 2.99±1.02 <sup>Ba</sup>  | 5.78±0.08 <sup>Aa</sup>  | 5.78±2.64 <sup>Aa</sup>  | 6.07±0.07 <sup>Aa</sup>  | 0.80±0.01 <sup>Ca</sup>  |
| 2   | 7.139    | Hexanal                                | 1.32±0.02 <sup>Ab</sup>  | 0.92±0.06 <sup>Be</sup>  | 0.93±0.03 <sup>Bc</sup>  | 0.94±0.02 <sup>Be</sup>  | 0.08±0.001 <sup>Cf</sup> |
| 3   | 8.873    | 2-Heptanone                            | 0.17±0.01 <sup>Bc</sup>  | 0.17±0.002 <sup>Bg</sup> | 0.17±0.001 <sup>Bc</sup> | 0.2±0.004 <sup>Ag</sup>  | 0.04±0.001 <sup>Cg</sup> |
| 4   | 8.906    | Heptanal                               | ND                       | ND                       | ND                       | ND                       | ND                       |
| 5   | 9.573    | Pyrazine                               | ND                       | ND                       | ND                       | ND                       | 0.04±0.002 <sup>g</sup>  |
| 6   | 9.857    | 2-pentylfural                          | 2.54±0.02 <sup>Da</sup>  | 3.75±0.03 <sup>Cb</sup>  | 4.11±0.08 <sup>Ba</sup>  | 4.45±0.02 <sup>Ab</sup>  | 0.76±0.01 <sup>Eb</sup>  |
| 7   | 10.915   | 2-methylpyrazine                       | 0.06±0.002 <sup>Dc</sup> | 0.15±0.004 <sup>Cg</sup> | 0.18±0.002 <sup>Bc</sup> | 0.22±0.02 <sup>Ag</sup>  | 0.04±0.002 <sup>Eg</sup> |
| 8   | 12.874   | 2,5(6)-dimethylpyrazine                | 0.03±0.002 <sup>Dc</sup> | 0.04±0.001 <sup>Ch</sup> | 0.06±0.001 <sup>Bc</sup> | 0.07±0.003 <sup>Ah</sup> | 0.01±0.001 <sup>Eh</sup> |
| 9   | 13.074   | 2-ethylpyrazine                        | ND                       | ND                       | ND                       | ND                       | ND                       |
| 10  | 13.508   | 2,3-dimethylpyrazine                   | ND                       | ND                       | ND                       | ND                       | ND                       |
| 11  | 14.933   | Nonanal                                | 2.53±0.02 <sup>Ba</sup>  | 3.02±0.18 <sup>Af</sup>  | 2.64±0.004 <sup>Bb</sup> | 3.28±0.28 <sup>Ac</sup>  | 0.32±0.02 <sup>Cc</sup>  |
| 12  | 15.108   | 2-ethyl-5-methylpyrazine               | ND                       | ND                       | 0.01±0.002 <sup>Bc</sup> | 0.02±0.001 <sup>Ah</sup> | ND                       |
| 13  | 15.508   | 2, 3, 5-trimethylpyrazine              | ND                       | ND                       | ND                       | ND                       | ND                       |
| 14  | 15.517   | 2-ethyl-3-methylpyrazine               | ND                       | ND                       | ND                       | ND                       | ND                       |
| 15  | 16.834   | 3-ethyl-2,5-dimethylpyrazine           | ND                       | ND                       | ND                       | ND                       | ND                       |
| 16  | 17.284   | Furfural                               | 0.11±0.01 <sup>Dc</sup>  | 0.3±0.002 <sup>Bf</sup>  | 0.28±0.005 <sup>Cc</sup> | 0.43±0.02 <sup>Af</sup>  | 0.11±0.01 <sup>De</sup>  |
| 17  | 17.860   | 2-methyl-5-propylpyrazine              | ND                       | ND                       | ND                       | ND                       | ND                       |
| 18  | 18.343   | 3,5-diethyl-2-methylpyrazine           | ND                       | ND                       | ND                       | ND                       | ND                       |
| 19  | 22.936   | 2-Furanylmethanol                      | 0.33±0.02 <sup>Cc</sup>  | 1.06±0.06 <sup>Bd</sup>  | 1.03±0.03 <sup>Bc</sup>  | 1.50±0.03 <sup>Ad</sup>  | 0.23±0.02 <sup>Dd</sup>  |
|     |          | Total pyrazines                        | 0.09                     | 0.19                     | 0.25                     | 0.31                     | 0.09                     |
|     |          | Pyrazines (% of total GC-MS peak area) | 0.89                     | 1.25                     | 1.65                     | 1.80                     | 3.70                     |

| No. | RT (min) | Substances                             | 120 °C, 30 min           | 120 °C, 60 min           | 120 °C, 90 min           | 120 °C, 120 min          | 120 °C, 150 min          |
|-----|----------|----------------------------------------|--------------------------|--------------------------|--------------------------|--------------------------|--------------------------|
| 1   | 3.704    | 2-methylfural                          | 2.67±0.13 <sup>Da</sup>  | 4.02±0.02 <sup>Ba</sup>  | 3.57±0.03 <sup>Ca</sup>  | 4.58±0.08 <sup>Aa</sup>  | 4.14±0.14 <sup>Ba</sup>  |
| 2   | 7.139    | Hexanal                                | 0.78±0.004 <sup>Bc</sup> | 0.59±0.001 <sup>Ce</sup> | 0.58±0.08 <sup>Ce</sup>  | 1.18±0.10 <sup>Ac</sup>  | 1.10±0.04 <sup>Ac</sup>  |
| 3   | 8.873    | 2-Heptanone                            | 0.14±0.004 <sup>Ag</sup> | 0.13±0.002 <sup>Bg</sup> | ND                       | ND                       | ND                       |
| 4   | 8.906    | Heptanal                               | ND                       | ND                       | ND                       | ND                       | ND                       |
| 5   | 9.573    | Pyrazine                               | ND                       | ND                       | ND                       | ND                       | ND                       |
| 6   | 9.857    | 2-pentylfural                          | 2.00±0.03 <sup>Ec</sup>  | 3.10±0.02 <sup>Bc</sup>  | 2.54±0.04 <sup>Dc</sup>  | 3.52±0.06 <sup>Ac</sup>  | 3.03±0.03 <sup>Cc</sup>  |
| 7   | 10.915   | 2-methylpyrazine                       | 0.06±0.002 <sup>Ch</sup> | 0.14±0.003 <sup>Ag</sup> | 0.12±0.01 <sup>Bg</sup>  | 0.11±0.002 <sup>Bg</sup> | 0.12±0.01 <sup>Bg</sup>  |
| 8   | 12.874   | 2,5(6)-dimethylpyrazine                | 0.02±0.001 <sup>Da</sup> | ND                       | 0.08±0.002 <sup>Ch</sup> | 0.10±0.01 <sup>Bg</sup>  | 0.15±0.01 <sup>Ag</sup>  |
| 9   | 13.074   | 2-ethylpyrazine                        | ND                       | ND                       | 0.02±0.001 <sup>Bi</sup> | 0.04±0.002 <sup>Ah</sup> | 0.02±0.001 <sup>Ba</sup> |
| 10  | 13.508   | 2,3-dimethylpyrazine                   | ND                       | ND                       | ND                       | ND                       | ND                       |
| 11  | 14.933   | Nonanal                                | 2.61±0.01 <sup>Eb</sup>  | 3.29±0.09 <sup>Cb</sup>  | 2.89±0.01 <sup>Db</sup>  | 4.37±0.03 <sup>Ab</sup>  | 3.91±0.01 <sup>Bb</sup>  |
| 12  | 15.108   | 2-ethyl-5-methylpyrazine               | ND                       | ND                       | 0.03±0.001 <sup>Ai</sup> | ND                       | 0.03±0.003 <sup>Ah</sup> |
| 13  | 15.508   | 2, 3, 5-trimethylpyrazine              | ND                       | ND                       | ND                       | ND                       | ND                       |
| 14  | 15.517   | 2-ethyl-3-methylpyrazine               | ND                       | ND                       | ND                       | ND                       | ND                       |
| 15  | 16.834   | 3-ethyl-2,5-dimethylpyrazine           | ND                       | ND                       | ND                       | ND                       | ND                       |
| 16  | 17.284   | Furfural                               | 0.29±0.004 <sup>Df</sup> | 0.51±0.002 <sup>Af</sup> | 0.44±0.004 <sup>Bf</sup> | 0.50±0.01 <sup>Af</sup>  | 0.42±0.01 <sup>Cf</sup>  |
| 17  | 17.860   | 2-methyl-5-propylpyrazine              | ND                       | ND                       | ND                       | ND                       | ND                       |
| 18  | 18.343   | 3,5-diethyl-2-methylpyrazine           | ND                       | ND                       | ND                       | ND                       | ND                       |
| 19  | 22.936   | 2-Furanylmethanol                      | 0.89±0.01 <sup>Dd</sup>  | 1.71±0.09 <sup>Cd</sup>  | 1.64±0.01 <sup>Cd</sup>  | 2.02±0.02 <sup>Bd</sup>  | 2.2±0.07 <sup>Ad</sup>   |
|     |          | Total pyrazines                        | 0.08                     | 0.14                     | 0.25                     | 0.25                     | 0.32                     |
|     |          | Pyrazines (% of total GC-MS peak area) | 0.85                     | 1.04                     | 2.10                     | 1.52                     | 2.12                     |

| No. | RT (min) | Substances                             | 130 °C, 30 min           | 130 °C, 60 min           | 130 °C, 90 min            | 130 °C, 120 min          | 130 °C, 150 min           |
|-----|----------|----------------------------------------|--------------------------|--------------------------|---------------------------|--------------------------|---------------------------|
| 1   | 3.704    | 2-methylfural                          | 3.06±0.04 <sup>Ea</sup>  | 3.82±0.08 <sup>Da</sup>  | 4.85±0.09 <sup>Cb</sup>   | 6.14±0.06 <sup>Ab</sup>  | 5.24±0.11 <sup>Bb</sup>   |
| 2   | 7.139    | Hexanal                                | 0.51±0.03 <sup>Be</sup>  | 0.46±0.01 <sup>Ce</sup>  | 0.48±0.01 <sup>Ce</sup>   | 0.73±0.002 <sup>Ae</sup> | 0.38±0.01 <sup>Dd</sup>   |
| 3   | 8.873    | 2-Heptanone                            | ND                       | ND                       | ND                        | ND                       | ND                        |
| 4   | 8.906    | Heptanal                               | ND                       | ND                       | ND                        | ND                       | ND                        |
| 5   | 9.573    | Pyrazine                               | 0.06±0.002 <sup>Eh</sup> | 0.11±0.001 <sup>Dg</sup> | 0.12±0.01 <sup>Ch</sup>   | 0.14±0.004 <sup>Ai</sup> | 0.13±0.001 <sup>Bfg</sup> |
| 6   | 9.857    | 2-pentylfural                          | 2.81±0.01 <sup>Eb</sup>  | 3.59±0.01 <sup>Bb</sup>  | 3.24±0.02 <sup>Dc</sup>   | 4.71±0.02 <sup>Ac</sup>  | 3.42±0.004 <sup>Cc</sup>  |
| 7   | 10.915   | 2-methylpyrazine                       | 0.06±0.002 <sup>Bh</sup> | 0.06±0.001 <sup>Bh</sup> | 0.07±0.01 <sup>Ai</sup>   | 0.07±0.002 <sup>Aj</sup> | 0.07±0.003 <sup>Agh</sup> |
| 8   | 12.874   | 2,5(6)-dimethylpyrazine                | 0.05±0.001 <sup>Eh</sup> | 0.11±0.01 <sup>Dg</sup>  | 0.16±0.002 <sup>Ch</sup>  | 0.26±0.001 <sup>Bg</sup> | 0.31±0.01 <sup>Ac</sup>   |
| 9   | 13.074   | 2-ethylpyrazine                        | 0.01±0.001 <sup>Bi</sup> | 0.01±0.002 <sup>Bi</sup> | 0.25±0.001 <sup>Ag</sup>  | 0.01±0.001 <sup>Bk</sup> | 0.01±0.002 <sup>Bh</sup>  |
| 10  | 13.508   | 2,3-dimethylpyrazine                   | 0.10±0.002 <sup>g</sup>  | ND                       | ND                        | ND                       | ND                        |
| 11  | 14.933   | Nonanal                                | 2.06±0.06 <sup>Ec</sup>  | 2.97±0.03 <sup>Dc</sup>  | 5.07±0.07 <sup>Ca</sup>   | 7.48±0.02 <sup>Aa</sup>  | 6.72±0.13 <sup>Ba</sup>   |
| 12  | 15.108   | 2-ethyl-5-methylpyrazine               | 0.06±0.001 <sup>Ch</sup> | 0.05±0.002 <sup>Dh</sup> | 0.04±0.001 <sup>Eij</sup> | 0.17±0.003 <sup>Bh</sup> | 0.19±0.001 <sup>Af</sup>  |
| 13  | 15.508   | 2, 3, 5-trimethylpyrazine              | ND                       | ND                       | ND                        | ND                       | ND                        |
| 14  | 15.517   | 2-ethyl-3-methylpyrazine               | ND                       | ND                       | ND                        | ND                       | ND                        |
| 15  | 16.834   | 3-ethyl-2,5-dimethylpyrazine           | ND                       | ND                       | ND                        | ND                       | ND                        |
| 16  | 17.284   | Furfural                               | 0.37±0.01 <sup>Bf</sup>  | 0.36±0.001 <sup>Bf</sup> | 0.41±0.01 <sup>Af</sup>   | 0.36±0.01 <sup>Bf</sup>  | 0.34±0.02 <sup>Ce</sup>   |
| 17  | 17.860   | 2-methyl-5-propylpyrazine              | ND                       | ND                       | ND                        | ND                       | ND                        |
| 18  | 18.343   | 3,5-diethyl-2-methylpyrazine           | ND                       | ND                       | ND                        | ND                       | ND                        |
| 19  | 22.936   | 2-Furanylmethanol                      | 1.41±0.01 <sup>Dd</sup>  | 1.56±0.004 <sup>Bd</sup> | 1.72±0.01 <sup>Ad</sup>   | 1.76±0.01 <sup>Ad</sup>  | 1.5±0.05 <sup>Cd</sup>    |
|     |          | Total pyrazines                        | 0.34                     | 0.34                     | 0.64                      | 0.65                     | 0.71                      |
|     |          | Pyrazines (% of total GC-MS peak area) | 3.22                     | 2.60                     | 3.90                      | 2.98                     | 3.88                      |

| No. | RT (min) | Substances                             | 140 °C, 30 min            | 140 °C, 60 min           | 140 °C, 90 min           | 140 °C, 120 min          | 140 °C, 150 min           |
|-----|----------|----------------------------------------|---------------------------|--------------------------|--------------------------|--------------------------|---------------------------|
| 1   | 3.704    | 2-methylfural                          | 2.73±0.01 <sup>Db</sup>   | 2.59±0.01 <sup>Ea</sup>  | 7.69±0.03 <sup>Ba</sup>  | 15.16±0.06 <sup>Aa</sup> | 5.31±0.09 <sup>Ca</sup>   |
| 2   | 7.139    | Hexanal                                | -                         | -                        | 2.19±0.03 <sup>Bd</sup>  | 2.42±0.01 <sup>Ag</sup>  | ND                        |
| 3   | 8.873    | 2-Heptanone                            | 0.48±0.002 <sup>De</sup>  | 0.51±0.003 <sup>Ce</sup> | 1.35±0.001 <sup>Bg</sup> | 1.37±0.004 <sup>Ah</sup> | 0.42±0.01 <sup>Ee</sup>   |
| 4   | 8.906    | Heptanal                               | ND                        | ND                       | ND                       | ND                       | ND                        |
| 5   | 9.573    | Pyrazine                               | 0.08±0.002 <sup>Ef</sup>  | 0.17±0.001 <sup>Ch</sup> | 0.39±0.002 <sup>Bj</sup> | 0.45±0.001 <sup>Am</sup> | 0.12±0.001 <sup>Dhi</sup> |
| 6   | 9.857    | 2-pentylfural                          | 2.98±0.02 <sup>Ca</sup>   | 2.45±0.04 <sup>Eb</sup>  | 7.13±0.13 <sup>Bb</sup>  | 14.13±0.01 <sup>Ab</sup> | 2.83±0.02 <sup>Dc</sup>   |
| 7   | 10.915   | 2-methylpyrazine                       | 0.04±0.02 <sup>Di</sup>   | 0.05±0.002 <sup>Cj</sup> | 1.08±0.08 <sup>Af</sup>  | 0.85±0.02 <sup>Bk</sup>  | 0.09±0.005 <sup>Cij</sup> |
| 8   | 12.874   | 2,5(6)-dimethylpyrazine                | 0.07±0.001 <sup>Egh</sup> | 0.19±0.01 <sup>Dg</sup>  | 1.43±0.02 <sup>Be</sup>  | 2.52±0.08 <sup>Af</sup>  | 0.53±0.02 <sup>Ce</sup>   |
| 9   | 13.074   | 2-ethylpyrazine                        | 0.02±0.001 <sup>Da</sup>  | 0.01±0.001 <sup>Dk</sup> | 0.32±0.02 <sup>Ak</sup>  | 0.23±0.004 <sup>Ba</sup> | 0.15±0.001 <sup>Ch</sup>  |
| 10  | 13.508   | 2,3-dimethylpyrazine                   | ND                        | ND                       | 0.14±0.004 <sup>l</sup>  | ND                       | ND                        |
| 11  | 14.933   | Nonanal                                | 1.16±0.001 <sup>Dd</sup>  | 1.30±0.01 <sup>Cd</sup>  | 4.95±0.05 <sup>Bc</sup>  | 9.25±0.09 <sup>Ac</sup>  | 4.94±0.06 <sup>Bb</sup>   |
| 12  | 15.108   | 2-ethyl-5-methylpyrazine               | 0.06±0.001 <sup>Ej</sup>  | 0.13±0.002 <sup>Di</sup> | 0.54±0.001 <sup>Bi</sup> | 1.01±0.01 <sup>Aj</sup>  | 0.22±0.002 <sup>Cg</sup>  |
| 13  | 15.508   | 2, 3, 5-trimethylpyrazine              | ND                        | ND                       | ND                       | 0.69±0.01 <sup>Al</sup>  | 0.07±0.001 <sup>Bj</sup>  |
| 14  | 15.517   | 2-ethyl-3-methylpyrazine               | ND                        | ND                       | 0.45±0.01 <sup>j</sup>   | ND                       | ND                        |
| 15  | 16.834   | 3-ethyl-2,5-dimethylpyrazine           | ND                        | ND                       | 0.88±0.01 <sup>Bh</sup>  | 2.86±0.04 <sup>Ae</sup>  | 0.54±0.002 <sup>Ce</sup>  |
| 16  | 17.284   | Furfural                               | 0.42±0.02 <sup>Cf</sup>   | 0.36±0.004 <sup>Df</sup> | 1.04±0.04 <sup>Bg</sup>  | 1.27±0.03 <sup>Ai</sup>  | 0.38±0.02 <sup>CDf</sup>  |
| 17  | 17.860   | 2-methyl-5-propylpyrazine              | ND                        | ND                       | 0.17±0.03 <sup>Bl</sup>  | 0.24±0.02 <sup>An</sup>  | ND                        |
| 18  | 18.343   | 3,5-diethyl-2-methylpyrazine           | ND                        | ND                       | 0.20±0.003 <sup>Bl</sup> | 0.24±0.003 <sup>An</sup> | ND                        |
| 19  | 22.936   | 2-Furanylmethanol                      | 1.70±0.003 <sup>Bc</sup>  | 1.70±0.02 <sup>Bc</sup>  | 1.29±0.01 <sup>Df</sup>  | 6.72±0.08 <sup>Ad</sup>  | 1.39±0.02 <sup>Cd</sup>   |
|     |          | Total pyrazines                        | 0.27                      | 0.55                     | 5.60                     | 9.09                     | 1.72                      |
|     |          | Pyrazines (% of total GC-MS peak area) | 2.77                      | 5.81                     | 17.93                    | 15.3                     | 10.12                     |

Numbers are represented as the means ± standard deviations.

Mean values with different superscript capital letters in the same row have significant differences ( $p < 0.05$ ).

Mean values with different superscript small letters in the same column have significant differences at the same temperature ( $p < 0.05$ ).
