# Supplementary material for: Effect of free amino acids and peptide hydrolysates from sunflower seed protein on the formation of pyrazines under different heating conditions
Source: Royal Society of Chemistry journal article supplement (doi:10.1039/d1ra05140g), 2021-01-01
Supplement: d1ra05140g3.pdf [file d1ra05140g3.pdf]

**Supplementary materials Table S3.** Volatiles (GC-MS Peak Area  $\times 10^6$ ) detected in the hydrolyzed *SSP* model under different heating conditions

| No. | RT (min) | Substances                             | 100 °C, 30 min           | 100 °C, 60 min           | 100 °C, 90 min           | 100 °C, 120 min          | 100 °C, 150 min          |
|-----|----------|----------------------------------------|--------------------------|--------------------------|--------------------------|--------------------------|--------------------------|
| 1   | 3.704    | 2-methylfural                          | 2.96±0.002 <sup>Dc</sup> | 6.00±0.12 <sup>Cb</sup>  | 8.58±0.01 <sup>Ba</sup>  | 16.74±0.06 <sup>Ak</sup> | 16.63±0.04 <sup>Aa</sup> |
| 2   | 7.139    | Hexanal                                | 4.05±0.05 <sup>Ab</sup>  | 3.65±0.002 <sup>Bc</sup> | 3.49±0.02 <sup>Cc</sup>  | 2.21±0.09 <sup>De</sup>  | 1.55±0.03 <sup>Eg</sup>  |
| 3   | 8.873    | 2-Heptanone                            | 2.52±0.01 <sup>Cd</sup>  | 3.27±0.03 <sup>Bd</sup>  | 3.41±0.01 <sup>Ad</sup>  | 2.48±0.01 <sup>Cf</sup>  | 2.33±0.07 <sup>Df</sup>  |
| 4   | 8.906    | Heptanal                               | ND                       | ND                       | ND                       | ND                       | ND                       |
| 5   | 9.573    | Pyrazine                               | 0.18±0.01 <sup>Dh</sup>  | 0.10±0.01 <sup>Ei</sup>  | 0.29±0.01 <sup>Ci</sup>  | 0.35±0.01 <sup>Bb</sup>  | 0.39±0.01 <sup>Aj</sup>  |
| 6   | 9.857    | 2-pentylfural                          | 6.96±0.04 <sup>Da</sup>  | 8.85±0.01 <sup>Ba</sup>  | 6.91±0.06 <sup>Db</sup>  | 9.20±0.04 <sup>Aj</sup>  | 7.13±0.07 <sup>Cb</sup>  |
| 7   | 10.915   | 2-methylpyrazine                       | 1.36±0.02 <sup>De</sup>  | 3.04±0.06 <sup>Be</sup>  | 2.91±0.02 <sup>Cc</sup>  | 3.02±0.03 <sup>Bh</sup>  | 6.76±0.04 <sup>Ac</sup>  |
| 8   | 12.874   | 2,5(6)-dimethylpyrazine                | ND                       | 0.57±0.01 <sup>Ch</sup>  | 1.02±0.08 <sup>Bg</sup>  | 2.66±0.02 <sup>Ag</sup>  | 2.68±0.05 <sup>Ae</sup>  |
| 9   | 13.074   | 2-ethylpyrazine                        | ND                       | ND                       | 0.09±0.005 <sup>Cj</sup> | 0.35±0.001 <sup>Ab</sup> | 0.34±0.002 <sup>Bk</sup> |
| 10  | 13.508   | 2,3-dimethylpyrazine                   | ND                       | ND                       | ND                       | ND                       | 0.10±0.01 <sup>I</sup>   |
| 11  | 14.933   | Nonanal                                | 0.42±0.002 <sup>Eg</sup> | 0.68±0.01 <sup>Bg</sup>  | 0.44±0.002 <sup>Dh</sup> | 0.81±0.01 <sup>Ad</sup>  | 0.58±0.01 <sup>Ci</sup>  |
| 12  | 15.108   | 2-ethyl-5-methylpyrazine               | ND                       | ND                       | ND                       | 0.30±0.002 <sup>Aa</sup> | 0.30±0.01 <sup>Ak</sup>  |
| 13  | 15.508   | 2, 3, 5-trimethylpyrazine              | ND                       | ND                       | ND                       | ND                       | ND                       |
| 14  | 15.517   | 2-ethyl-3-methylpyrazine               | ND                       | ND                       | ND                       | ND                       | ND                       |
| 15  | 16.834   | 3-ethyl-2,5-dimethylpyrazine           | ND                       | ND                       | ND                       | ND                       | ND                       |
| 16  | 17.284   | Furfural                               | ND                       | 0.13±0.001 <sup>Ci</sup> | 1.05±0.05 <sup>Ag</sup>  | 0.63±0.02 <sup>Bc</sup>  | 0.64±0.01 <sup>Bh</sup>  |
| 17  | 17.860   | 2-methyl-5-propylpyrazine              | ND                       | ND                       | ND                       | ND                       | ND                       |
| 18  | 18.343   | 3,5-diethyl-2-methylpyrazine           | ND                       | ND                       | ND                       | ND                       | ND                       |
| 19  | 22.936   | 2-Furanylmethanol                      | 0.51±0.02 <sup>Ef</sup>  | 0.86±0.01 <sup>Df</sup>  | 1.34±0.02 <sup>Cf</sup>  | 3.43±0.01 <sup>Bi</sup>  | 3.71±0.01 <sup>Ad</sup>  |
|     |          | Total pyrazines                        | 1.54                     | 3.84                     | 5.36                     | 7.31                     | 11.21                    |
|     |          | Pyrazines (% of total GC-MS peak area) | 8.12                     | 14.14                    | 18.15                    | 17.33                    | 25.99                    |

| No. | RT (min) | Substances                             | 110 °C, 30 min           | 110 °C, 60 min           | 110 °C, 90 min           | 110 °C, 120 min          | 110 °C, 150 min           |
|-----|----------|----------------------------------------|--------------------------|--------------------------|--------------------------|--------------------------|---------------------------|
| 1   | 3.704    | 2-methylfural                          | 2.26±0.03 <sup>Eb</sup>  | 4.41±0.01 <sup>Da</sup>  | 5.18±0.02 <sup>Ba</sup>  | 5.07±0.03 <sup>Ca</sup>  | 5.82±0.02 <sup>Aa</sup>   |
| 2   | 7.139    | Hexanal                                | 1.90±0.01 <sup>Ac</sup>  | 1.09±0.02 <sup>Cd</sup>  | 1.16±0.01 <sup>Be</sup>  | 0.84±0.002 <sup>Df</sup> | 0.68±0.01 <sup>Ef</sup>   |
| 3   | 8.873    | 2-Heptanone                            | 1.08±0.02 <sup>Ad</sup>  | 0.81±0.01 <sup>Bf</sup>  | 0.74±0.01 <sup>Cg</sup>  | 0.68±0.02 <sup>Dg</sup>  | 0.58±0.03 <sup>Efg</sup>  |
| 4   | 8.906    | Heptanal                               | ND                       | ND                       | ND                       | ND                       | ND                        |
| 5   | 9.573    | Pyrazine                               | 0.07±0.01 <sup>Db</sup>  | 0.15±0.002 <sup>Bi</sup> | 0.15±0.001 <sup>Bj</sup> | 0.13±0.01 <sup>Cb</sup>  | 0.17±0.01 <sup>Aij</sup>  |
| 6   | 9.857    | 2-pentylfural                          | 2.66±0.01 <sup>Ca</sup>  | 3.54±0.02 <sup>ABb</sup> | 3.71±0.05 <sup>ABb</sup> | 3.97±0.03 <sup>Ab</sup>  | 2.97±0.59 <sup>Bb</sup>   |
| 7   | 10.915   | 2-methylpyrazine                       | 0.63±0.01 <sup>De</sup>  | 1.07±0.03 <sup>Cd</sup>  | 1.56±0.04 <sup>Ad</sup>  | 1.28±0.02 <sup>Bd</sup>  | 1.54±0.01 <sup>Ad</sup>   |
| 8   | 12.874   | 2,5(6)-dimethylpyrazine                | 0.14±0.001 <sup>Dh</sup> | 0.90±0.01 <sup>Ce</sup>  | 1.02±0.02 <sup>Bf</sup>  | 0.90±0.01 <sup>Ce</sup>  | 1.23±0.02 <sup>Ae</sup>   |
| 9   | 13.074   | 2-ethylpyrazine                        | ND                       | 0.11±0.01 <sup>Cj</sup>  | 0.16±0.01 <sup>Bj</sup>  | 0.11±0.002 <sup>Cj</sup> | 0.31±0.004 <sup>Ahi</sup> |
| 10  | 13.508   | 2,3-dimethylpyrazine                   | ND                       | ND                       | 0.06±0.001 <sup>Ak</sup> | 0.04±0.002 <sup>Ck</sup> | 0.05±0.001 <sup>Bj</sup>  |
| 11  | 14.933   | Nonanal                                | 0.25±0.002 <sup>Eg</sup> | 0.39±0.001 <sup>Dg</sup> | 0.54±0.02 <sup>Ch</sup>  | 0.63±0.01 <sup>Bh</sup>  | 0.79±0.01 <sup>Af</sup>   |
| 12  | 15.108   | 2-ethyl-5-methylpyrazine               | ND                       | 0.06±0.001 <sup>Bk</sup> | 0.06±0.002 <sup>Bk</sup> | 0.06±0.01 <sup>Bk</sup>  | 0.14±0.01 <sup>Aij</sup>  |
| 13  | 15.508   | 2, 3, 5-trimethylpyrazine              | ND                       | ND                       | ND                       | ND                       | ND                        |
| 14  | 15.517   | 2-ethyl-3-methylpyrazine               | ND                       | ND                       | ND                       | ND                       | ND                        |
| 15  | 16.834   | 3-ethyl-2,5-dimethylpyrazine           | ND                       | ND                       | ND                       | ND                       | ND                        |
| 16  | 17.284   | Furfural                               | 0.05±0.002 <sup>Ei</sup> | 0.23±0.001 <sup>Dh</sup> | 0.33±0.002 <sup>Ci</sup> | 0.39±0.03 <sup>Bi</sup>  | 0.44±0.02 <sup>Agh</sup>  |
| 17  | 17.860   | 2-methyl-5-propylpyrazine              | ND                       | ND                       | ND                       | ND                       | ND                        |
| 18  | 18.343   | 3,5-diethyl-2-methylpyrazine           | ND                       | ND                       | ND                       | ND                       | ND                        |
| 19  | 22.936   | 2-Furanylmethanol                      | 0.35±0.01 <sup>Ef</sup>  | 1.39±0.01 <sup>Dc</sup>  | 2.04±0.04 <sup>Cc</sup>  | 2.19±0.03 <sup>Bc</sup>  | 2.74±0.01 <sup>Ac</sup>   |
|     |          | Total pyrazines                        | 0.89                     | 2.52                     | 3.34                     | 2.91                     | 3.88                      |
|     |          | Pyrazines (% of total GC-MS peak area) | 9.48                     | 17.81                    | 20.00                    | 17.86                    | 22.22                     |

| No. | RT (min) | Substances                             | 120 °C, 30 min           | 120 °C, 60 min           | 120 °C, 90 min           | 120 °C, 120 min          | 120 °C, 150 min           |
|-----|----------|----------------------------------------|--------------------------|--------------------------|--------------------------|--------------------------|---------------------------|
| 1   | 3.704    | 2-methylfural                          | 9.32±0.08 <sup>Da</sup>  | 13.64±0.06 <sup>Ca</sup> | 15.19±0.19 <sup>Ba</sup> | 15.23±0.17 <sup>Ba</sup> | 37.56±0.44 <sup>Aa</sup>  |
| 2   | 7.139    | Hexanal                                | 2.35±0.01 <sup>Bd</sup>  | 2.18±0.03 <sup>Cf</sup>  | 1.37±0.01 <sup>Dg</sup>  | 1.14±0.02 <sup>Eg</sup>  | 2.63±0.02 <sup>Ag</sup>   |
| 3   | 8.873    | 2-Heptanone                            | 1.33±0.02 <sup>Cf</sup>  | 1.79±0.01 <sup>Bh</sup>  | 0.84±0.01 <sup>Dc</sup>  | 0.86±0.004 <sup>Di</sup> | 1.90±0.003 <sup>Ah</sup>  |
| 4   | 8.906    | Heptanal                               | ND                       | ND                       | ND                       | ND                       | ND                        |
| 5   | 9.573    | Pyrazine                               | 0.42±0.002 <sup>Dh</sup> | 0.47±0.005 <sup>Ck</sup> | 0.48±0.001 <sup>Bj</sup> | 0.47±0.002 <sup>Cl</sup> | 0.56±0.003 <sup>Ajk</sup> |
| 6   | 9.857    | 2-pentylfural                          | 8.40±0.16 <sup>Db</sup>  | 10.28±0.08 <sup>Bb</sup> | 11.01±0.09 <sup>Ab</sup> | 8.76±0.04 <sup>Cb</sup>  | 11.14±0.04 <sup>Ac</sup>  |
| 7   | 10.915   | 2-methylpyrazine                       | 4.15±0.02 <sup>Ec</sup>  | 5.00±0.06 <sup>Cd</sup>  | 4.78±0.02 <sup>Dd</sup>  | 5.38±0.05 <sup>Bd</sup>  | 5.84±0.06 <sup>Ad</sup>   |
| 8   | 12.874   | 2,5(6)-dimethylpyrazine                | 2.08±0.02 <sup>Ee</sup>  | 3.06±0.06 <sup>De</sup>  | 3.30±0.1 <sup>Bf</sup>   | 4.49±0.01 <sup>Ce</sup>  | 4.15±0.08 <sup>Ae</sup>   |
| 9   | 13.074   | 2-ethylpyrazine                        | 0.39±0.01 <sup>Eh</sup>  | 0.63±0.02 <sup>Dj</sup>  | 0.74±0.01 <sup>Ci</sup>  | 1.15±0.02 <sup>Ag</sup>  | 1.09±0.01 <sup>Bi</sup>   |
| 10  | 13.508   | 2,3-dimethylpyrazine                   | ND                       | 0.26±0.01 <sup>Bm</sup>  | 0.16±0.003 <sup>Ck</sup> | 0.38±0.004 <sup>Am</sup> | 0.26±0.02 <sup>Bkl</sup>  |
| 11  | 14.933   | Nonanal                                | 1.47±0.03 <sup>Df</sup>  | 2.11±0.01 <sup>Cg</sup>  | 3.23±0.27 <sup>Ae</sup>  | 2.78±0.02 <sup>Bf</sup>  | 3.82±0.60 <sup>Af</sup>   |
| 12  | 15.108   | 2-ethyl-5-methylpyrazine               | 0.16±0.01 <sup>Ei</sup>  | 0.37±0.01 <sup>Di</sup>  | 0.59±0.01 <sup>Cj</sup>  | 0.75±0.004 <sup>Bj</sup> | 0.94±0.01 <sup>Ai</sup>   |
| 13  | 15.508   | 2, 3, 5-trimethylpyrazine              | ND                       | ND                       | ND                       | ND                       | 0.17±0.002 <sup>l</sup>   |
| 14  | 15.517   | 2-ethyl-3-methylpyrazine               | ND                       | 0.19±0.02 <sup>Cn</sup>  | 0.52±0.002 <sup>Bb</sup> | 0.57±0.01 <sup>Ak</sup>  | 0.59±0.04 <sup>Aj</sup>   |
| 15  | 16.834   | 3-ethyl-2,5-dimethylpyrazine           | ND                       | ND                       | ND                       | ND                       | ND                        |
| 16  | 17.284   | Furfural                               | 0.84±0.06 <sup>Dg</sup>  | 1.03±0.03 <sup>Bci</sup> | 1.14±0.06 <sup>Ah</sup>  | 1.05±0.05 <sup>Bh</sup>  | 0.96±0.02 <sup>Ci</sup>   |
| 17  | 17.860   | 2-methyl-5-propylpyrazine              | ND                       | ND                       | ND                       | ND                       | ND                        |
| 18  | 18.343   | 3,5-diethyl-2-methylpyrazine           | ND                       | ND                       | ND                       | ND                       | ND                        |
| 19  | 22.936   | 2-Furanylmethanol                      | 4.27±0.38 <sup>Dc</sup>  | 6.09±0.03 <sup>Cc</sup>  | 8.49±0.07 <sup>Bc</sup>  | 8.68±0.02 <sup>Bc</sup>  | 12.99±0.27 <sup>Ab</sup>  |
|     |          | Total pyrazines                        | 8.04                     | 11.01                    | 11.71                    | 14.24                    | 14.56                     |
|     |          | Pyrazines (% of total GC-MS peak area) | 22.85                    | 23.38                    | 22.59                    | 27.55                    | 17.21                     |

| No. | RT (min) | Substances                             | 130 °C, 30 min           | 130 °C, 60 min           | 130 °C, 90 min            | 130 °C, 120 min          | 130 °C, 150 min          |
|-----|----------|----------------------------------------|--------------------------|--------------------------|---------------------------|--------------------------|--------------------------|
| 1   | 3.704    | 2-methylfural                          | 4.08±0.04 <sup>Ca</sup>  | 3.51±0.09 <sup>Da</sup>  | 3.05±0.05 <sup>Ea</sup>   | 5.47±0.03 <sup>Aa</sup>  | 5.16±0.04 <sup>Bb</sup>  |
| 2   | 7.139    | Hexanal                                | 0.97±0.02 <sup>Ae</sup>  | 0.67±0.01 <sup>Be</sup>  | 0.52±0.003 <sup>Ef</sup>  | 0.63±0.02 <sup>Cg</sup>  | 0.59±0.01 <sup>Dg</sup>  |
| 3   | 8.873    | 2-Heptanone                            | 0.62±0.003 <sup>Af</sup> | 0.31±0.02 <sup>Dg</sup>  | 0.33±0.01 <sup>Dc</sup>   | 0.36±0.002 <sup>Ch</sup> | 0.39±0.01 <sup>Bh</sup>  |
| 4   | 8.906    | Heptanal                               | ND                       | ND                       | ND                        | ND                       | ND                       |
| 5   | 9.573    | Pyrazine                               | 0.19±0.002 <sup>Ag</sup> | 0.1±0.01 <sup>Dh</sup>   | 0.11±0.003 <sup>CDa</sup> | 0.12±0.008 <sup>Cl</sup> | 0.16±0.01 <sup>Bk</sup>  |
| 6   | 9.857    | 2-pentylfural                          | 3.03±0.18 <sup>Db</sup>  | 3.24±0.02 <sup>Ca</sup>  | 1.98±0.005 <sup>Eb</sup>  | 3.82±0.02 <sup>Bb</sup>  | 5.41±0.01 <sup>Aa</sup>  |
| 7   | 10.915   | 2-methylpyrazine                       | 1.59±0.01 <sup>Ad</sup>  | 0.87±0.01 <sup>Ed</sup>  | 0.94±0.01 <sup>Dd</sup>   | 1.01±0.01 <sup>Cf</sup>  | 1.51±0.03 <sup>Bf</sup>  |
| 8   | 12.874   | 2,5(6)-dimethylpyrazine                | 0.92±0.03 <sup>Ce</sup>  | 0.85±0.01 <sup>Dd</sup>  | 0.79±0.02 <sup>Ee</sup>   | 1.34±0.01 <sup>Be</sup>  | 2.03±0.03 <sup>Ae</sup>  |
| 9   | 13.074   | 2-ethylpyrazine                        | 0.15±0.002 <sup>Cg</sup> | 0.11±0.001 <sup>Dh</sup> | 0.15±0.003 <sup>Ch</sup>  | 0.17±0.002 <sup>Bk</sup> | 0.28±0.001 <sup>Aj</sup> |
| 10  | 13.508   | 2,3-dimethylpyrazine                   | 0.13±0.001 <sup>Dg</sup> | 0.04±0.001 <sup>Ei</sup> | 0.15±0.002 <sup>Ch</sup>  | 0.17±0.01 <sup>Bk</sup>  | 0.28±0.01 <sup>Aj</sup>  |
| 11  | 14.933   | Nonanal                                | 0.61±0.01 <sup>Ef</sup>  | 1.46±0.01 <sup>Cc</sup>  | 0.94±0.002 <sup>Dd</sup>  | 2.06±0.04 <sup>Bd</sup>  | 2.60±0.03 <sup>Ad</sup>  |
| 12  | 15.108   | 2-ethyl-5-methylpyrazine               | 0.08±0.42 <sup>Ag</sup>  | 0.11±0.01 <sup>Bh</sup>  | 0.11±0.002 <sup>Bi</sup>  | 0.25±0.01 <sup>ABj</sup> | 0.34±0.02 <sup>ABi</sup> |
| 13  | 15.508   | 2, 3, 5-trimethylpyrazine              | ND                       | ND                       | ND                        | ND                       | 0.29±0.02 <sup>j</sup>   |
| 14  | 15.517   | 2-ethyl-3-methylpyrazine               | ND                       | ND                       | ND                        | ND                       | ND                       |
| 15  | 16.834   | 3-ethyl-2,5-dimethylpyrazine           | ND                       | ND                       | ND                        | ND                       | ND                       |
| 16  | 17.284   | Furfural                               | 0.45±0.002 <sup>Af</sup> | 0.43±0.001 <sup>Bf</sup> | 0.32±0.01 <sup>Cg</sup>   | 0.32±0.01 <sup>Ci</sup>  | 0.28±0.01 <sup>Dj</sup>  |
| 17  | 17.860   | 2-methyl-5-propylpyrazine              | ND                       | ND                       | ND                        | ND                       | ND                       |
| 18  | 18.343   | 3,5-diethyl-2-methylpyrazine           | ND                       | ND                       | ND                        | ND                       | ND                       |
| 19  | 22.936   | 2-Furanylmethanol                      | 1.89±0.01 <sup>Cc</sup>  | 2.09±0.11 <sup>Bb</sup>  | 1.58±0.02 <sup>Dh</sup>   | 3.42±0.08 <sup>Ac</sup>  | 3.45±0.05 <sup>Ac</sup>  |
|     |          | Total pyrazines                        | 3.51                     | 2.51                     | 2.57                      | 3.38                     | 5.17                     |
|     |          | Pyrazines (% of total GC-MS peak area) | 23.86                    | 18.20                    | 23.43                     | 17.66                    | 22.71                    |

| No. | RT (min) | Substances                             | 140 °C, 30 min           | 140 °C, 60 min           | 140 °C, 90 min            | 140 °C, 120 min          | 140 °C, 150 min          |
|-----|----------|----------------------------------------|--------------------------|--------------------------|---------------------------|--------------------------|--------------------------|
| 1   | 3.704    | 2-methylfural                          | 10.40±0.05 <sup>Ca</sup> | 10.08±0.02 <sup>Da</sup> | 6.77±0.03 <sup>Eb</sup>   | 18.47±0.03 <sup>Ba</sup> | 18.97±0.03 <sup>Aa</sup> |
| 2   | 7.139    | Hexanal                                | 1.47±0.03 <sup>Ag</sup>  | 1.22±0.01 <sup>Cd</sup>  | 1.28±0.08 <sup>BCj</sup>  | 1.53±0.02 <sup>Ah</sup>  | 1.32±0.04 <sup>Bh</sup>  |
| 3   | 8.873    | 2-Heptanone                            | 0.34±0.02 <sup>Dj</sup>  | 0.70±0.005 <sup>Bd</sup> | 0.60±0.05 <sup>Al</sup>   | 0.52±0.01 <sup>Ck</sup>  | 0.83±0.03 <sup>Ci</sup>  |
| 4   | 8.906    | Heptanal                               | ND                       | ND                       | ND                        | ND                       | ND                       |
| 5   | 9.573    | Pyrazine                               | 0.39±0.01 <sup>Bj</sup>  | 0.34±0.01 <sup>Cd</sup>  | 0.42±0.02 <sup>An</sup>   | 0.29±0.01 <sup>DI</sup>  | 0.37±0.01 <sup>Bk</sup>  |
| 6   | 9.857    | 2-pentylfural                          | 8.70±0.10 <sup>Db</sup>  | 9.25±3.51 <sup>Cb</sup>  | 5.10±0.10 <sup>Ec</sup>   | 15.43±0.03 <sup>Ab</sup> | 14.32±0.32 <sup>Bb</sup> |
| 7   | 10.915   | 2-methylpyrazine                       | 4.05±0.05 <sup>Cd</sup>  | 4.07±0.03 <sup>Cc</sup>  | 4.24±0.06 <sup>Dd</sup>   | 1.63±0.06 <sup>Ag</sup>  | 2.44±0.06 <sup>Bf</sup>  |
| 8   | 12.874   | 2,5(6)-dimethylpyrazine                | 2.29±0.01 <sup>Ae</sup>  | 3.17±0.03 <sup>Cc</sup>  | 2.99±0.01 <sup>Bf</sup>   | 3.23±0.07 <sup>Ce</sup>  | 3.63±0.02 <sup>De</sup>  |
| 9   | 13.074   | 2-ethylpyrazine                        | 0.78±0.02 <sup>Dd</sup>  | 0.60±0.002 <sup>Bd</sup> | 0.67±0.01 <sup>Cfg</sup>  | 0.57±0.004 <sup>Ak</sup> | 0.58±0.01 <sup>Aj</sup>  |
| 10  | 13.508   | 2,3-dimethylpyrazine                   | 0.26±0.01 <sup>Ck</sup>  | 0.23±0.01 <sup>Bd</sup>  | 0.17±0.01 <sup>Ao</sup>   | 0.17±0.01 <sup>Am</sup>  | 0.22±0.02 <sup>Cl</sup>  |
| 11  | 14.933   | Nonanal                                | 1.64±0.06 <sup>Af</sup>  | 4.34±0.34 <sup>Bc</sup>  | 6.89±0.01 <sup>Ca</sup>   | 12.38±0.02 <sup>Ec</sup> | 8.96±0.04 <sup>Dc</sup>  |
| 12  | 15.108   | 2-ethyl-5-methylpyrazine               | 0.54±0.004 <sup>Ci</sup> | 0.70±0.10 <sup>Bd</sup>  | 0.72±0.01 <sup>Bg</sup>   | 0.88±0.01 <sup>Ai</sup>  | 0.81±0.01 <sup>Ai</sup>  |
| 13  | 15.508   | 2, 3, 5-trimethylpyrazine              | ND                       | 0.72±0.002 <sup>Bd</sup> | 0.62±0.001 <sup>Ckl</sup> | 0.72±0.004 <sup>Bj</sup> | 0.84±0.01 <sup>Ai</sup>  |
| 14  | 15.517   | 2-ethyl-3-methylpyrazine               | 0.54±0.002 <sup>Ai</sup> | ND                       | 0.51±0.03 <sup>Bm</sup>   | ND                       | ND                       |
| 15  | 16.834   | 3-ethyl-2,5-dimethylpyrazine           | ND                       | 1.29±0.01 <sup>Cd</sup>  | 1.04±0.06 <sup>Dh</sup>   | 1.79±0.09 <sup>Bf</sup>  | 2.24±0.06 <sup>Ag</sup>  |
| 16  | 17.284   | Furfural                               | 0.78±0.01 <sup>Ch</sup>  | 0.60±0.02 <sup>Dd</sup>  | 0.80±0.01 <sup>Ci</sup>   | 0.92±0.01 <sup>Ai</sup>  | 0.83±0.02 <sup>Bi</sup>  |
| 17  | 17.860   | 2-methyl-5-propylpyrazine              | ND                       | 0.08±0.01 <sup>Cd</sup>  | 0.08±0.001 <sup>Cp</sup>  | 0.15±0.002 <sup>Am</sup> | 0.14±0.001 <sup>Bl</sup> |
| 18  | 18.343   | 3,5-diethyl-2-methylpyrazine           | ND                       | 0.25±0.002 <sup>Dd</sup> | 0.44±0.004 <sup>Cn</sup>  | 0.91±0.01 <sup>Ai</sup>  | 0.72±0.02 <sup>Bi</sup>  |
| 19  | 22.936   | 2-Furanylmethanol                      | 5.31±0.09 <sup>Cc</sup>  | 4.30±0.10 <sup>Db</sup>  | 4.17±0.03 <sup>De</sup>   | 6.51±0.09 <sup>Ad</sup>  | 6.24±0.06 <sup>Bd</sup>  |
|     |          | Total pyrazines                        | 9.63                     | 12.05                    | 12.7                      | 11.26                    | 12.82                    |
|     |          | Pyrazines (% of total GC-MS peak area) | 25.69                    | 28.73                    | 33.86                     | 17.03                    | 20.20                    |

Numbers are represented as the means ± standard deviations.

Mean values with different superscript capital letters in the same row have significant differences ( $p < 0.05$ ).

Mean values with different superscript small letters in the same column have significant differences at the same temperature ( $p < 0.05$ ).
